# Supplementary material
Source: Royal Society of Chemistry journal article supplement (doi:10.1039/d6ta01152g)
Supplement: d6ta01152g1.pdf [file d6ta01152g1.pdf]

## Supporting Information

### **Structural regulation of ionic covalent organic frameworks for enhanced CO<sub>2</sub> capture and catalytic conversion**

Xiaoqing Yang,<sup>a</sup> Bihua Chen,<sup>a,b</sup> Junfeng Zeng,<sup>a</sup> Zhiyong Li,<sup>c</sup> Yan Zhang<sup>a,\*</sup> and Shiguo Zhang<sup>a</sup>

<sup>a</sup>College of Materials Science and Engineering, Hunan University, Changsha 410082, Hunan, China

<sup>b</sup>Key Laboratory of Materials Physics, Centre for Environmental and Energy Nanomaterials, Anhui

Key Laboratory of Nanomaterials and Nanotechnology, Institute of Solid State Physics, HFIPS,

Chinese Academy of Sciences, Hefei 230031, Anhui, China

<sup>c</sup>School of Chemistry and Chemical Engineering, Henan Normal University, Xinxiang 453007,

Henan, China

E-mail: [zyan1980@hnu.edu.cn](mailto:zyan1980@hnu.edu.cn)

## 1. Gram-scale synthesis of NKCOF41 and various ionic COFs

### 1.1. Synthesis of NKCOF41

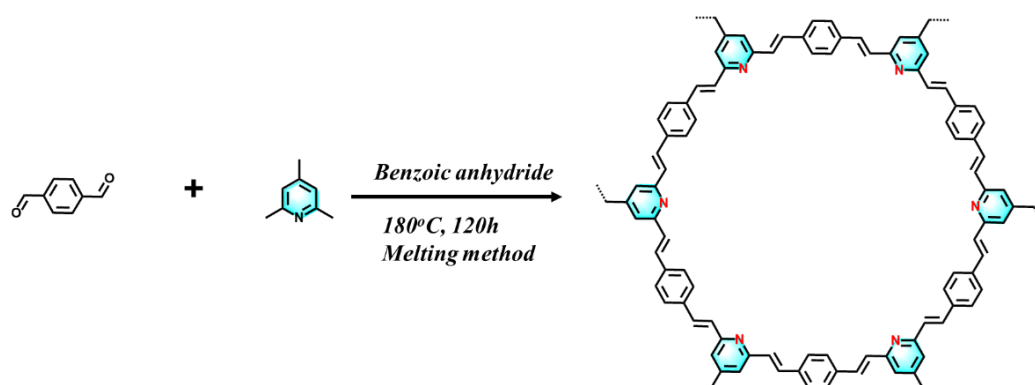

**Scheme S1** Schematic diagram of NKCOF41 synthesis.

First, as shown in **Scheme 1**, using 2,4,6-trimethylpyridine (TMP, 1225  $\mu\text{L}$ , 10 mmol) and terephthalaldehyde (TPA, 2010 mg, 15 mmol) as the reaction monomers, and selecting benzoic anhydride (BA, 2255 mg, 10 mmol) as the melting agent, a large quantity of microporous pyridine-based COF material (NKCOF41) with high specific surface area was successfully synthesized (90% yield).

### 1.2. Synthesis of $\text{NKCOF41}^+ - \text{C}_2\text{H}_4\text{OHBr}^-$

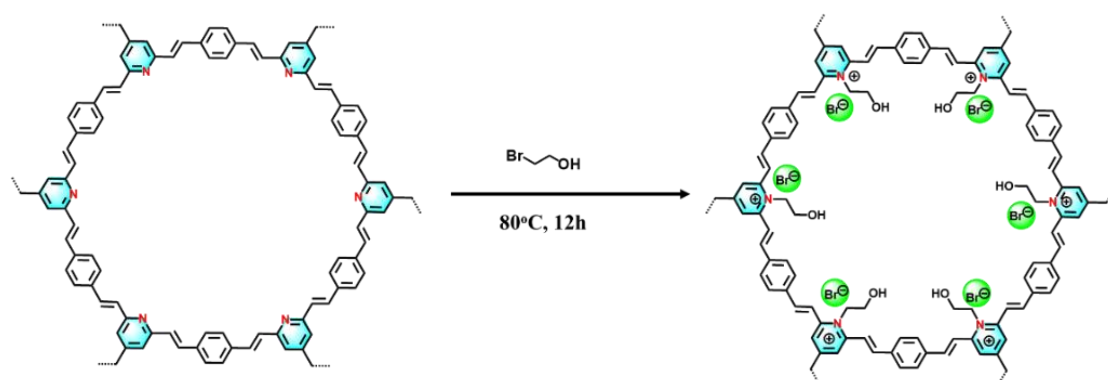

**Scheme S2** Schematic diagram of  $\text{NKCOF41}^+ - \text{C}_2\text{H}_4\text{OHBr}^-$  synthesis.

### 1.3. Synthesis of $\text{NKCOF41H}^+\text{-Br}^-$

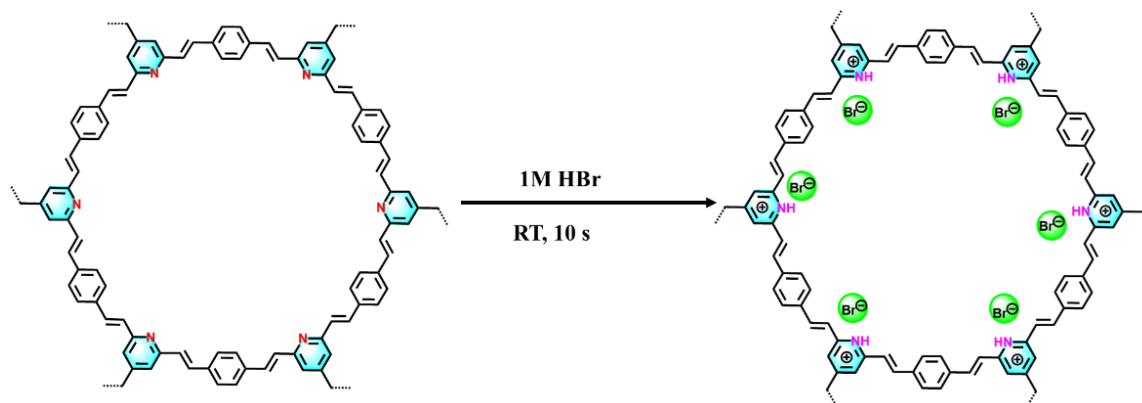

**Scheme S3** Schematic diagram of  $\text{NKCOF41H}^+\text{-Br}^-$  synthesis.

As shown in Scheme S3,  $\text{NKCOF41}$  (1.00 g) was directly dispersed in 20 mL of 1 M hydrobromic acid (HBr) (0.02 mol, 1.62 g), ultrasonicated for 10 s, and the solid product was collected by centrifugation. It was purified via Soxhlet extraction with deionized water and ethanol (24 h each), and then vacuum-dried at 100 °C for 12 h to obtain 1.16 g of the protonated functionalized product  $\text{NKCOF41H}^+\text{-Br}^-$  (92% yield).

#### 1.4. Synthesis of $\text{NKCOF41}^+-\text{C}_2\text{H}_5\text{Br}^-$

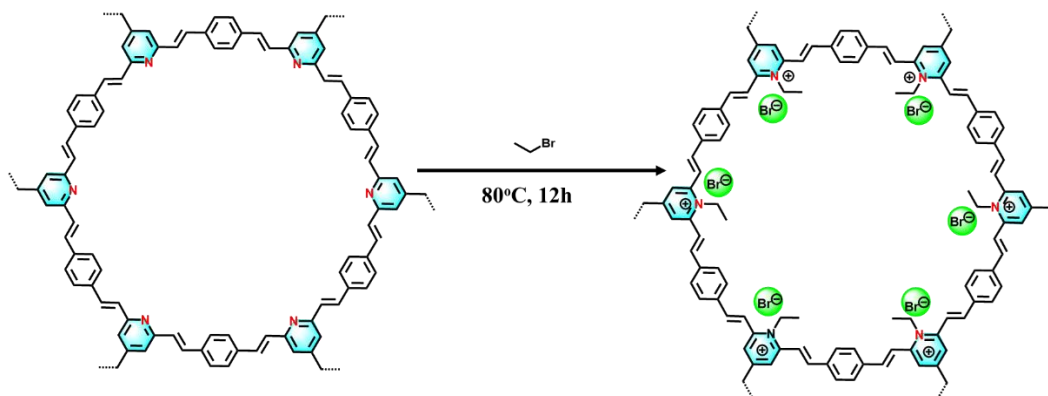

**Scheme S4** Schematic diagram of  $\text{NKCOF41}^+-\text{C}_2\text{H}_5\text{Br}^-$  synthesis.

As shown in **Scheme S4**, NKCOF41 (1.00 g) was dispersed in anhydrous ethanol (20 mL), and excess bromoethane (0.05 mol, 5.45 g) was added under reflux for 24 h. The solid product was collected by centrifugation, purified via Soxhlet extraction with ethanol (24 h), and dried under vacuum at  $100^\circ\text{C}$  for 12 h to afford 1.2 g of the ionic covalent organic framework (denoted as  $\text{NKCOF41}^+-\text{C}_2\text{H}_5\text{Br}^-$ ) in 85% yield.

## 2. Adsorption Isotherm Analysis

### Adsorption Isotherm Analysis

To elucidate the adsorption thermodynamics and surface interactions, two classical isotherm models – Langmuir and Freundlich – were applied to interpret the equilibrium data.

**Langmuir Isotherm Model:** This model postulates monolayer adsorption on homogeneous surfaces with energetically equivalent sites. The separation factor ( $RL = [1/(1+b \times P_e)]$ ), ranging between 0.47 and 0.98 across all systems, confirmed favorable adsorption conditions ( $0 < RL < 1$ ). The nonlinearized Langmuir equation is expressed as:

$$q = \frac{Q_0 b P_e}{1 + b P_e} \quad (1)$$

where  $Q_0$  denotes theoretical monolayer capacity (derived from slope analysis),  $b$  represents the affinity constant (calculated from intercept), and  $P_e$  is equilibrium pressure.

**Freundlich Isotherm Model:** As an empirical model describing heterogeneous adsorption systems, the Freundlich equation effectively characterizes multilayer sorption processes. All derived exponent values ( $n > 1$ ) suggest favorable  $CO_2$  uptake on COF, through combined physicochemical interactions. The mathematical expression is given by:

$$q = K_f (P_e)^{\frac{1}{n}} \quad (2)$$

where  $K_f$  reflects adsorption capacity (determined from intercept) and the dimensionless

parameter  $n$  (obtained from slope) quantifies adsorption intensity and surface heterogeneity.

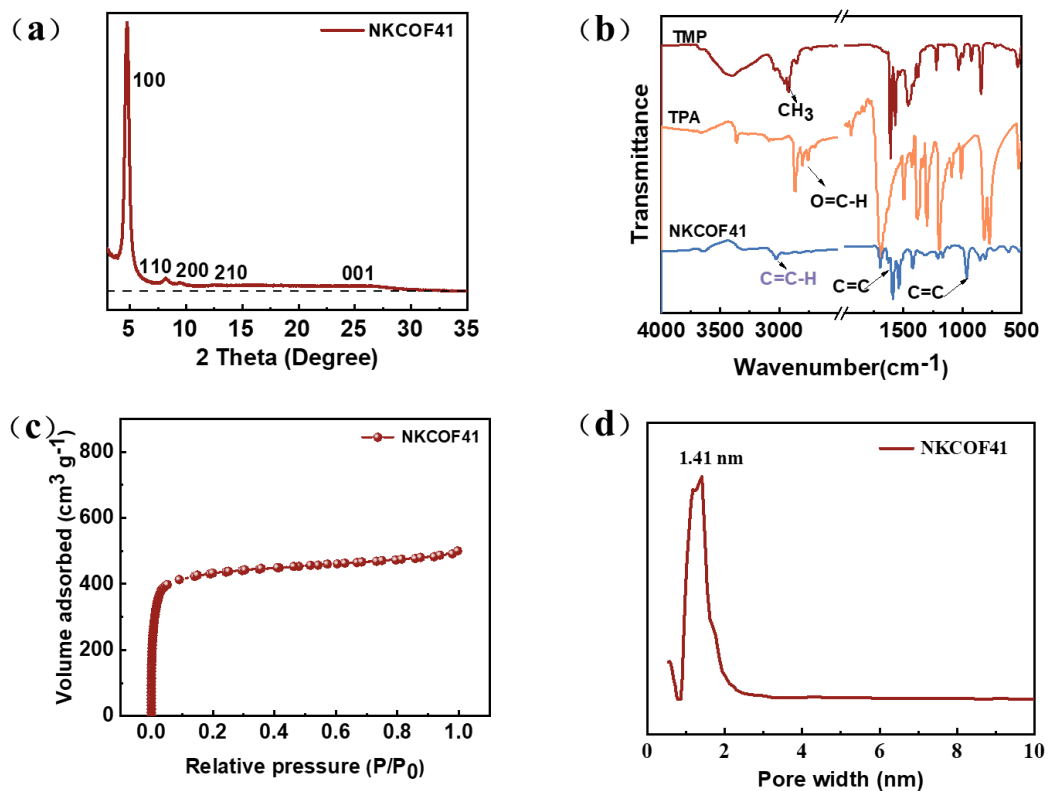

**Fig. S1** (a) PXRD pattern of NKCOF41; (b) FT-IR spectra of TMP, TPA, and NKCOF41; (c) N<sub>2</sub> adsorption-desorption isotherm of NKCOF41 at 77 K; (d) NKCOF41 pore distribution calculated by quenched solid density functional theory.

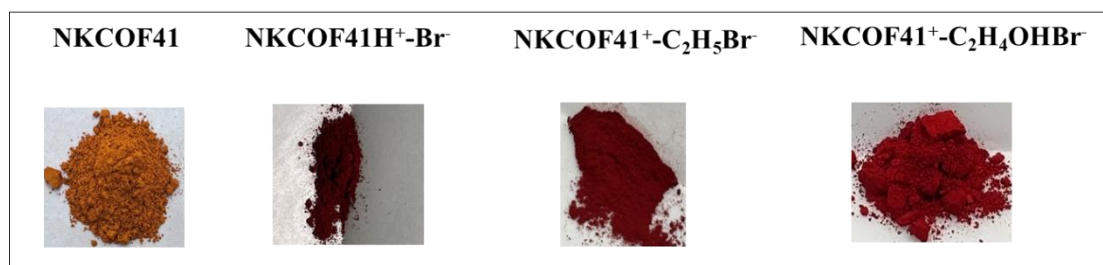

**Fig. S2** NKCOF41 and ionic COF powders.

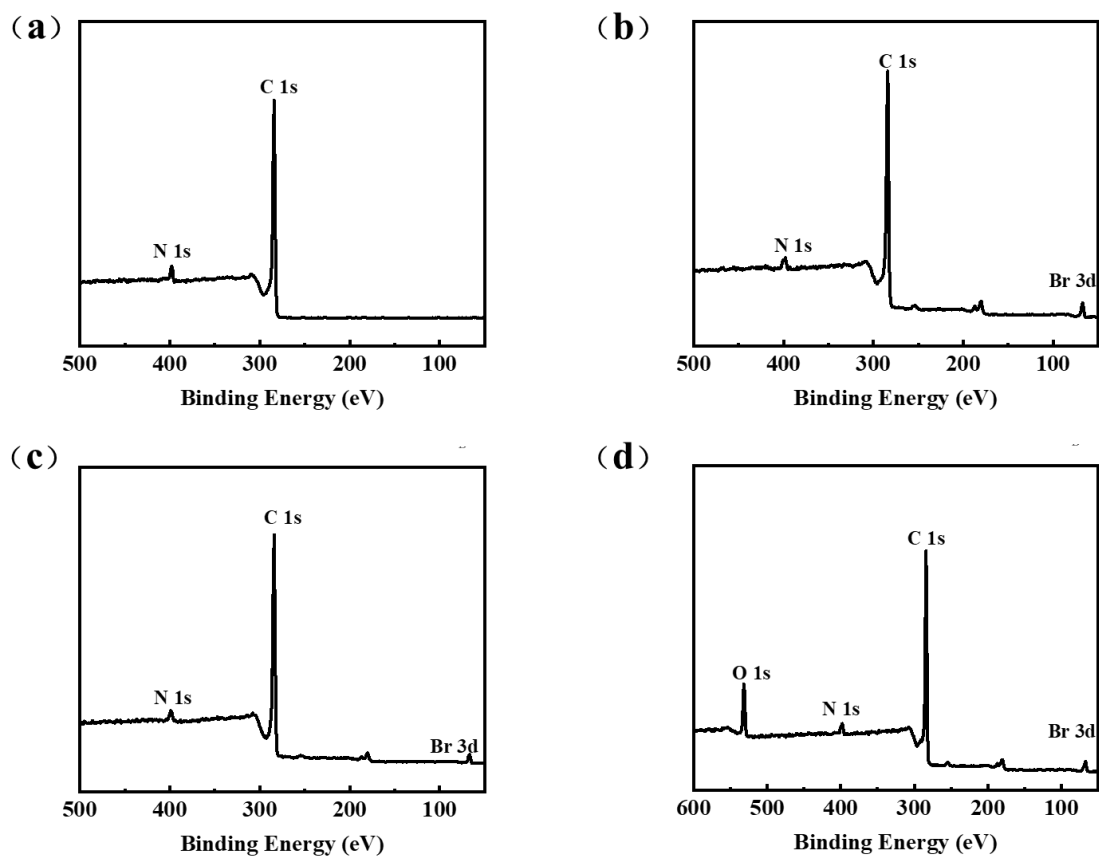

**Fig. S3** XPS spectra of NKCOF41 (a), NKCOF41H<sup>+</sup>-Br<sup>-</sup> (b), NKCOF41<sup>+</sup>-C<sub>2</sub>H<sub>5</sub>Br<sup>-</sup> (c), and NKCOF41<sup>+</sup>-C<sub>2</sub>H<sub>4</sub>OHBr<sup>-</sup> (d).

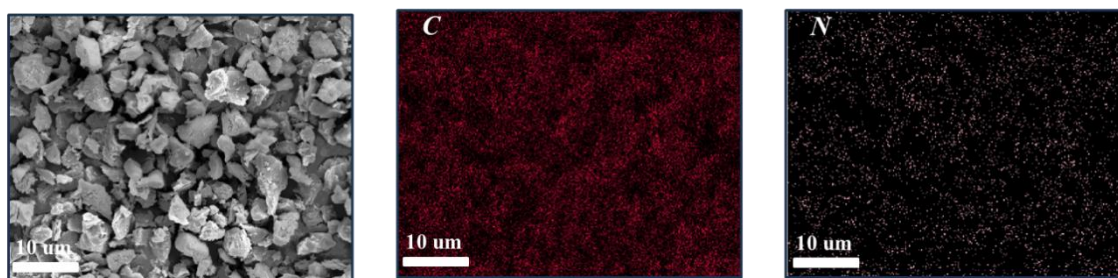

**Fig. S4** SEM image of NKCOF41 and elemental (C and N) mapping images.

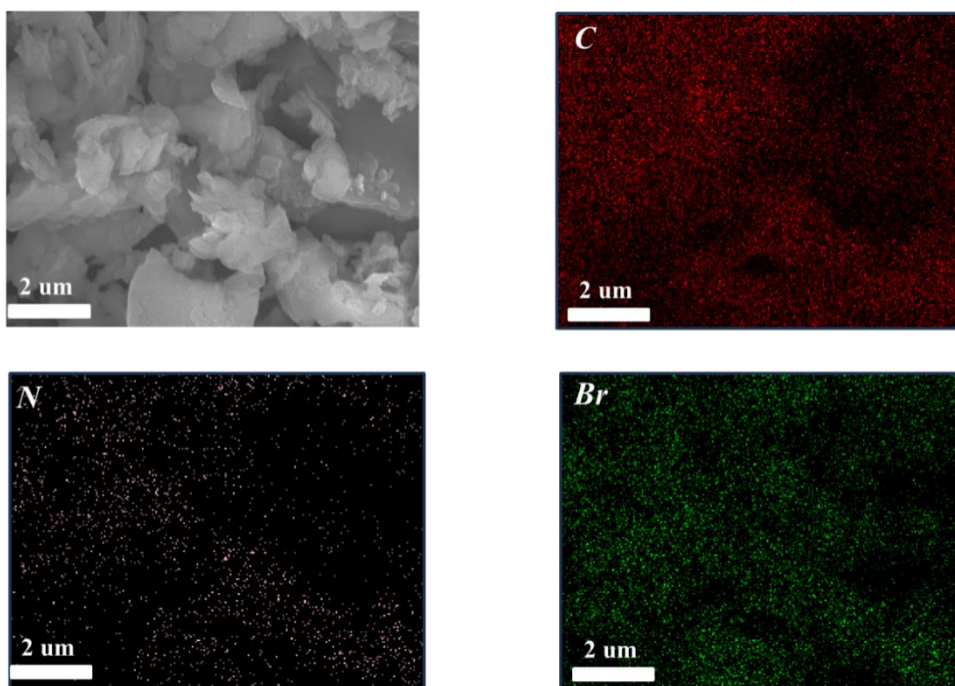

**Fig. S5** SEM image of NKCOF41H<sup>+</sup>-Br<sup>-</sup> and elemental (C, N, and Br) mapping images.

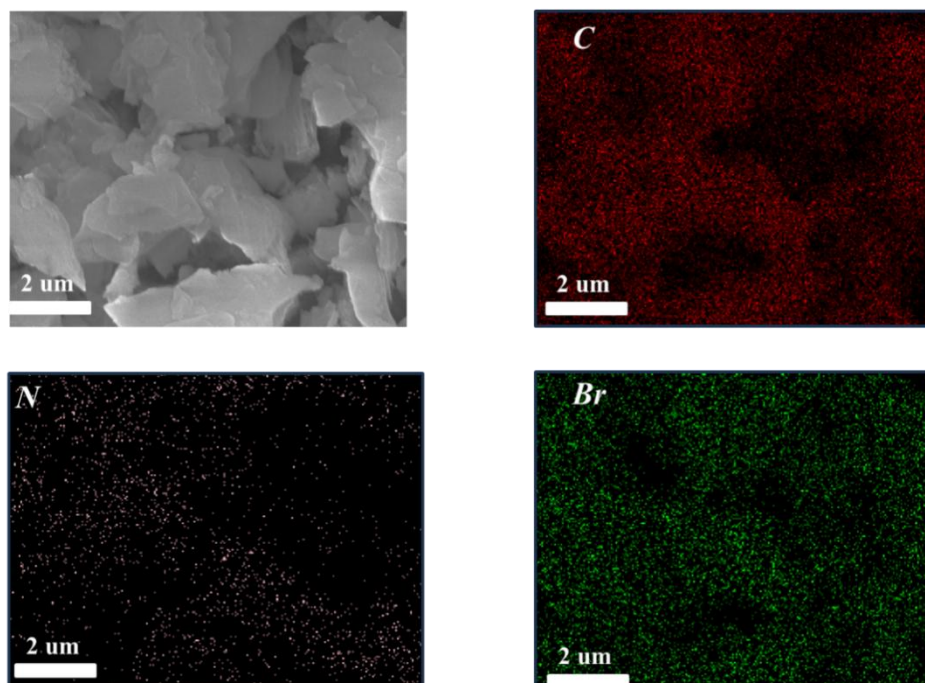

**Fig. S6** SEM image of NKCOF41<sup>+</sup>-C<sub>2</sub>H<sub>5</sub>Br<sup>-</sup> and elemental (C, N, and Br) mapping images

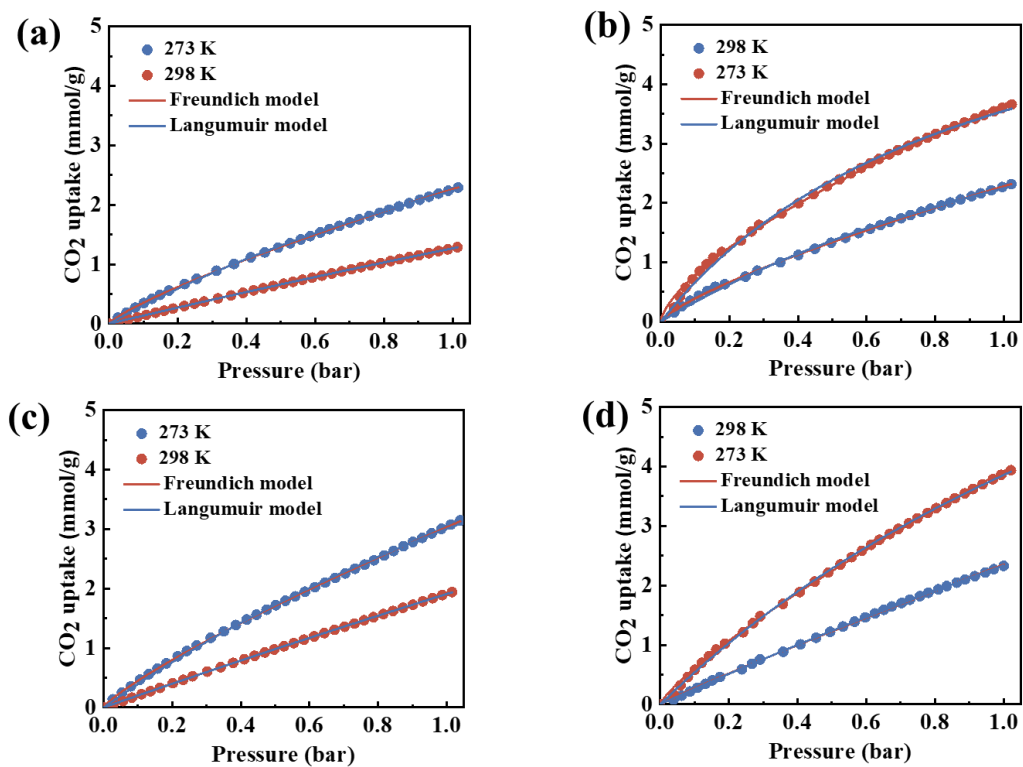

**Fig. S7** Non-linear curve fitting of CO<sub>2</sub> adsorption isotherms (273 and 298 K) of NKCOF41, NKCOF41H<sup>+</sup>-Br<sup>-</sup>, NKCOF41<sup>+</sup>-C<sub>2</sub>H<sub>5</sub>Br<sup>-</sup>, and NKCOF41<sup>+</sup>-C<sub>2</sub>H<sub>4</sub>OHBr<sup>-</sup>.

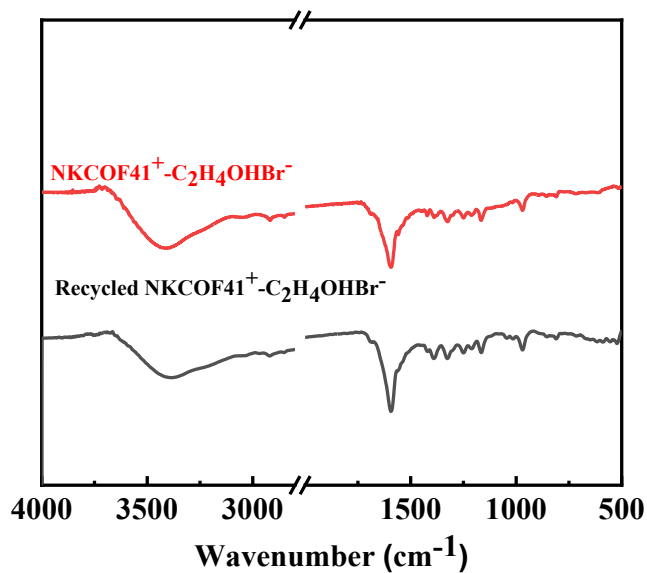

**Fig. S8.** FT-IR spectra of fresh and recycled NKCOF41<sup>+</sup>-C<sub>2</sub>H<sub>4</sub>OHBr<sup>-</sup>.

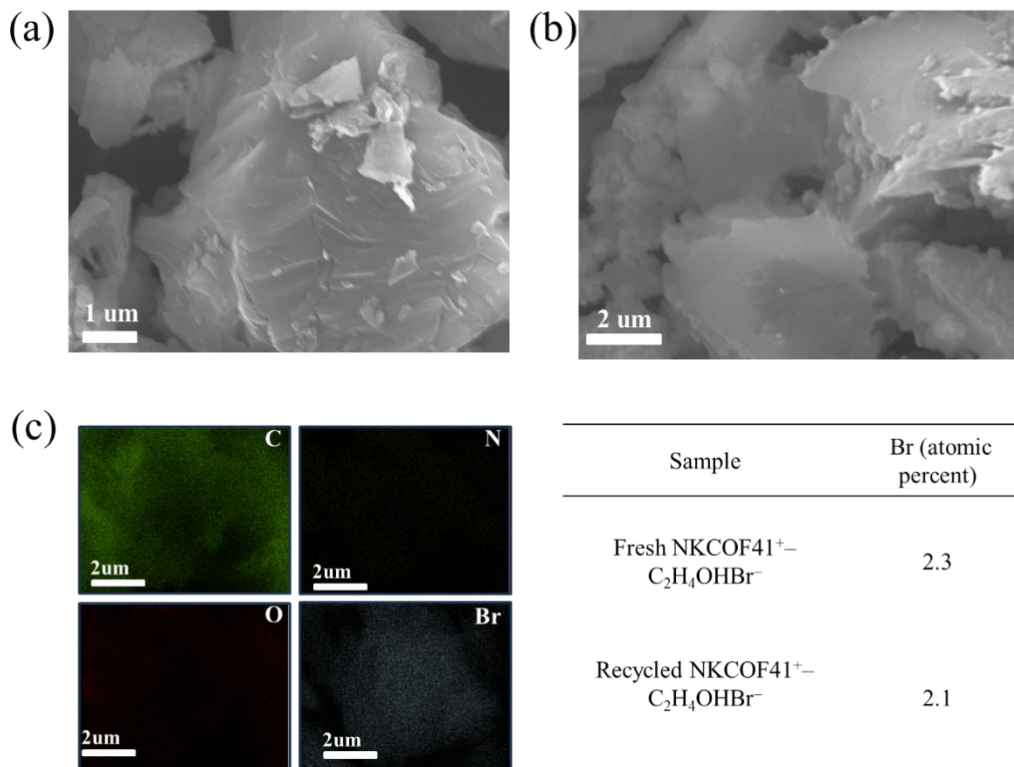

**Fig. S9.** (a, b) SEM images of fresh and recycled NKCOF41<sup>+</sup>-C<sub>2</sub>H<sub>4</sub>OHBr<sup>-</sup>, (c) EDS image of recycled NKCOF41<sup>+</sup>-C<sub>2</sub>H<sub>5</sub>Br<sup>-</sup>.

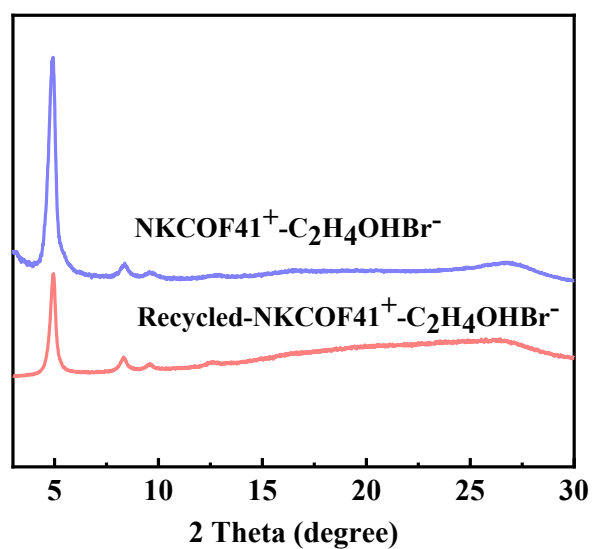

**Fig. S10.** XRD images of fresh and recycled NKCOF41<sup>+</sup>-C<sub>2</sub>H<sub>4</sub>OHBr<sup>-</sup>.

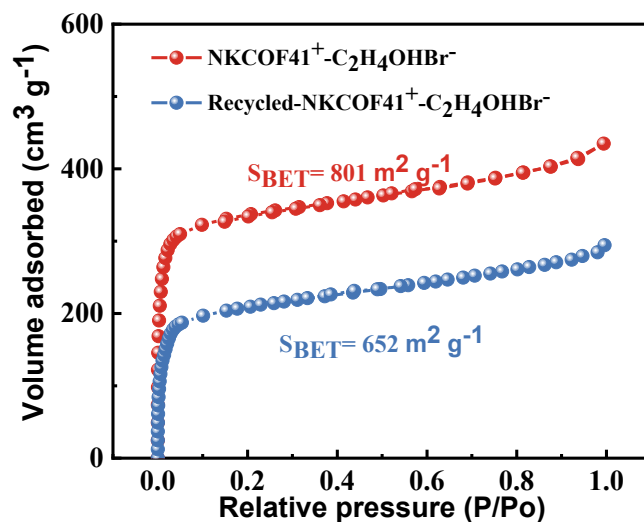

**Fig. S11.** N<sub>2</sub> adsorption-desorption isotherms of fresh and recycled NKCOF41<sup>+</sup>-C<sub>2</sub>H<sub>4</sub>OHBr<sup>-</sup>.

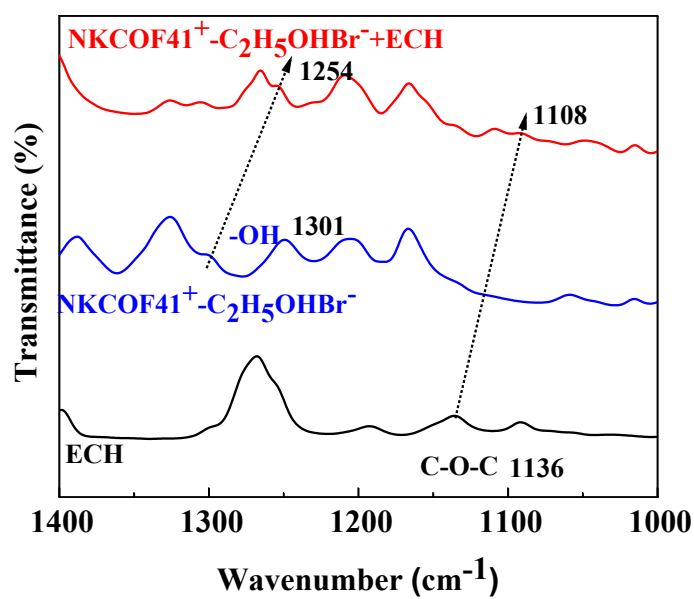

**Fig. S12** FT-IR spectra of ECH, ECH + NKCOF41<sup>+</sup>-C<sub>2</sub>H<sub>4</sub>OHBr<sup>-</sup>, and NKCOF41<sup>+</sup>-C<sub>2</sub>H<sub>4</sub>OHBr<sup>-</sup>.

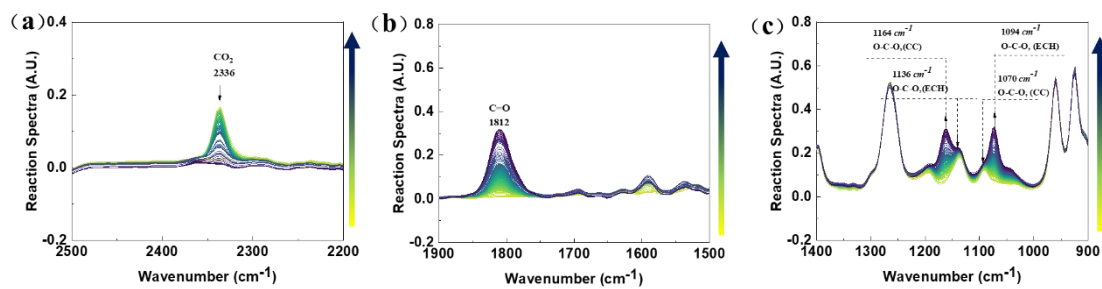

**Fig. S13** In-situ react IR spectra of  $\text{NKCOF41}^+-\text{C}_2\text{H}_4\text{OHBr}^-$  catalyzing  $\text{CO}_2$ -ECH cycloaddition at ambient pressure and  $60\text{ }^\circ\text{C}$  for 12 h

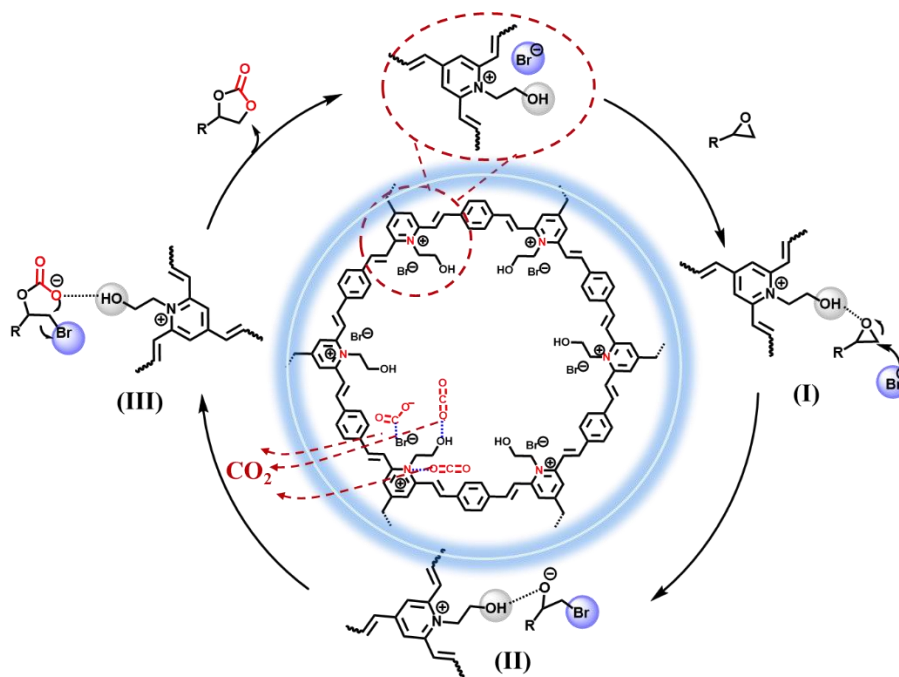

**Fig. S14** Illustration of the proposed mechanism for the cycloaddition reaction between  $\text{CO}_2$  and epoxide catalyzed by the  $\text{NKCOF41}^+-\text{C}_2\text{H}_4\text{OHBr}^-$ .

**Table S1.** Summary of specific surface area, pore size, and CO<sub>2</sub> adsorption of COFs.

| COF                                                                   | $S_{\text{BET}}$ (m <sup>2</sup> g <sup>-1</sup> ) | $V_{\text{Total}}$ (cm <sup>3</sup> g <sup>-1</sup> ) | Pore size (nm) | CO <sub>2</sub> uptake (mmol g <sup>-1</sup> ) |       |
|-----------------------------------------------------------------------|----------------------------------------------------|-------------------------------------------------------|----------------|------------------------------------------------|-------|
|                                                                       |                                                    |                                                       |                | 273 K                                          | 298 K |
| NKCOF41                                                               | 1337                                               | 0.774                                                 | 1.41           | 2.29                                           | 1.29  |
| NKCOF41 <sup>+</sup> -C <sub>2</sub> H <sub>5</sub> Br <sup>-</sup>   | 875                                                | 0.642                                                 | 1.13           | 3.15                                           | 1.94  |
| NKCOF41H <sup>+</sup> -Br <sup>-</sup>                                | 980                                                | 0.673                                                 | 1.13           | 3.66                                           | 2.32  |
| NKCOF41 <sup>+</sup> -C <sub>2</sub> H <sub>4</sub> OHBr <sup>-</sup> | 801                                                | 0.538                                                 | 1.13           | 3.94                                           | 2.33  |

**Table S2.** Corresponding parameters after fitting Langmuir and Freundlich.

| COF                                                                   | T(K)   | Q <sub>exp</sub> | Langmuir         |                  |       |                | Freundlich       |                |       |                |
|-----------------------------------------------------------------------|--------|------------------|------------------|------------------|-------|----------------|------------------|----------------|-------|----------------|
|                                                                       |        |                  | q <sub>mod</sub> | Q <sub>max</sub> | kl    | R <sup>2</sup> | q <sub>mod</sub> | K <sub>f</sub> | n     | R <sup>2</sup> |
| NKCOF41                                                               | 273.15 | 2.290            | 2.256            | 7.3735           | 0.434 | 0.998          | 2.293            | 1.273          | 1.241 | 0.999          |
|                                                                       | 298.15 | 1.287            | 1.284            | 15.5387          | 0.089 | 0.999          | 2.290            | 2.265          | 1.050 | 0.999          |
| NKCOF41H <sup>+</sup> -Br <sup>-</sup>                                | 273.15 | 3.659            | 3.588            | 6.9311           | 1.049 | 0.997          | 3.713            | 3.656          | 1.496 | 0.998          |
|                                                                       | 298.15 | 2.316            | 2.275            | 6.326            | 0.550 | 0.997          | 2.316            | 2.281          | 1.301 | 0.999          |
| NKCOF41 <sup>+</sup> -C <sub>2</sub> H <sub>3</sub> Br <sup>-</sup>   | 273.15 | 3.147            | 3.090            | 11.479           | 0.354 | 0.998          | 1.942            | 3.032          | 1.207 | 0.999          |
|                                                                       | 298.15 | 1.940            | 1.937            | 35.488           | 0.057 | 0.999          | 3.132            | 1.913          | 1.033 | 0.999          |
| NKCOF41 <sup>+</sup> -C <sub>2</sub> H <sub>4</sub> OHBr <sup>-</sup> | 273.15 | 3.938            | 3.913            | 12.413           | 0.451 | 0.999          | 3.990            | 3.923          | 1.237 | 0.999          |
|                                                                       | 298.15 | 2.330            | 2.337            | 21.228           | 0.124 | 0.999          | 2.354            | 2.354          | 1.065 | 0.999          |

**Table S3.** Comparison of the CO<sub>2</sub> capture capacity of different COFs and ionic materials.

| Entry | Material                                                              | $S_{BET}$ (m <sup>2</sup> g <sup>-1</sup> ) | CO <sub>2</sub> uptake (mmol g <sup>-1</sup> ) |       | Ref.      |
|-------|-----------------------------------------------------------------------|---------------------------------------------|------------------------------------------------|-------|-----------|
|       |                                                                       |                                             | 273 K                                          | 298 K |           |
| 1     | PPIL@COFA-40                                                          | 752                                         | 1.28                                           |       | 1         |
| 2     | COF-CN                                                                | 486                                         | 1.43                                           |       | 2         |
| 3     | HPMBr0.5                                                              | 558                                         | 1.74                                           | 0.93  | 3         |
| 4     | Fe <sup>3+</sup> doped Py-1P COFs                                     | 1718                                        | 1.8                                            | 1.21  | 4         |
| 5     | [HBIM-2]Br-BCB (1)                                                    | 440                                         | 2.02                                           | 1.36  | 5         |
| 6     | PyTTA-BFBIIm-ionic COFs                                               | 1532                                        | 2.11                                           |       | 6         |
| 7     | Meso-PR-36                                                            | 782                                         | 2.16                                           | 1.32  | 7         |
| 8     | TAPT-BP <sup>2+</sup> -COF                                            | 473.5                                       | 2.54                                           | 1.52  | 8         |
| 9     | TFPA-TAPA                                                             | 1091                                        | 2.56                                           |       | 9         |
| 10    | Gua-HCPIP-4                                                           | 598                                         | 2.72                                           |       | 10        |
| 11    | PTPIM                                                                 | 542                                         | 2.77                                           | 1.72  | 11        |
| 12    | NHC-CAP-1(Zn <sup>2+</sup> )                                          | 1040                                        | 2.80                                           | 1.72  | 12        |
| 13    | 3D-BMTA-COF-[Ac]50%                                                   | 1140                                        | 3.17                                           | 1.72  | 13        |
| 14    | [Et <sub>4</sub> NBr]50%-PyCOF                                        | 879                                         | 3.75                                           | 1.97  | 14        |
| 15    | [HO <sub>2</sub> C]100%-H <sub>2</sub> P-COF                          | 364                                         | 3.95                                           |       | 15        |
| 16    | NKCOF41 <sup>+</sup> -C <sub>2</sub> H <sub>4</sub> OHBr <sup>-</sup> | 801                                         | 3.94                                           | 2.33  | This work |

### 3. NMR spectra of the cyclic carbonate products

**4-phenyl-1,3-dioxolan-2-one:**  $^1\text{H}$  NMR (400 MHz, Chloroform-*d*)  $\delta$  7.34 (dt,  $J = 6.1$ , 2.5 Hz, 3H), 7.27 (dd,  $J = 7.4$ , 2.3 Hz, 2H), 5.59 (t,  $J = 8.0$  Hz, 1H), 4.71 (t,  $J = 8.4$  Hz, 1H), 4.25 (dd,  $J = 8.6$ , 7.9 Hz, 1H).  $^{13}\text{C}$  NMR (101 MHz, Chloroform-*d*)  $\delta$  155.27, 136.17, 130.06, 129.56, 126.27, 78.38, 71.54.

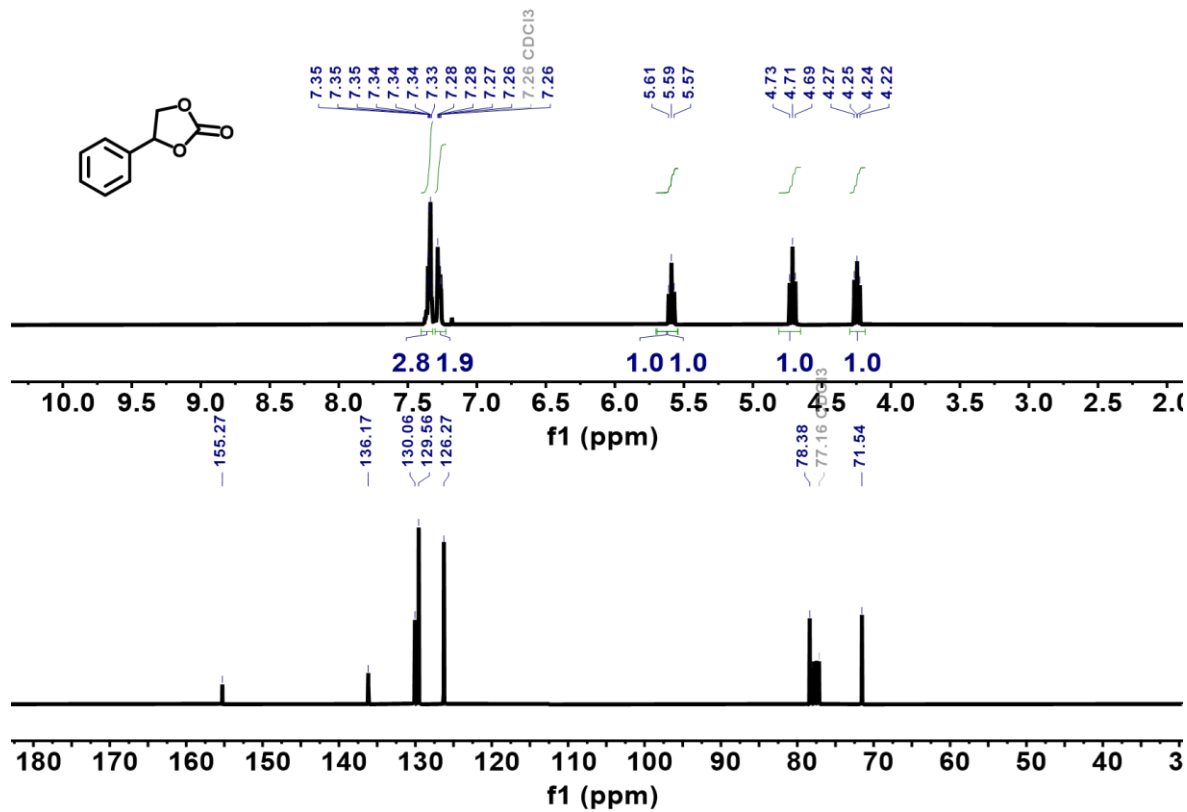

**4-methyl-1,3-dioxolan-2-one:**  $^1\text{H}$  NMR (400 MHz, Chloroform-*d*)  $\delta$  4.80 (td,  $J = 7.4$ , 6.2 Hz, 1H), 4.49 (t,  $J = 8.1$  Hz, 1H), 3.95 (dd,  $J = 8.5$ , 7.2 Hz, 1H), 1.40 (d,  $J = 6.3$  Hz, 3H).  $^{13}\text{C}$  NMR (101 MHz, Chloroform-*d*)  $\delta$  155.41, 73.95, 70.95, 19.50.

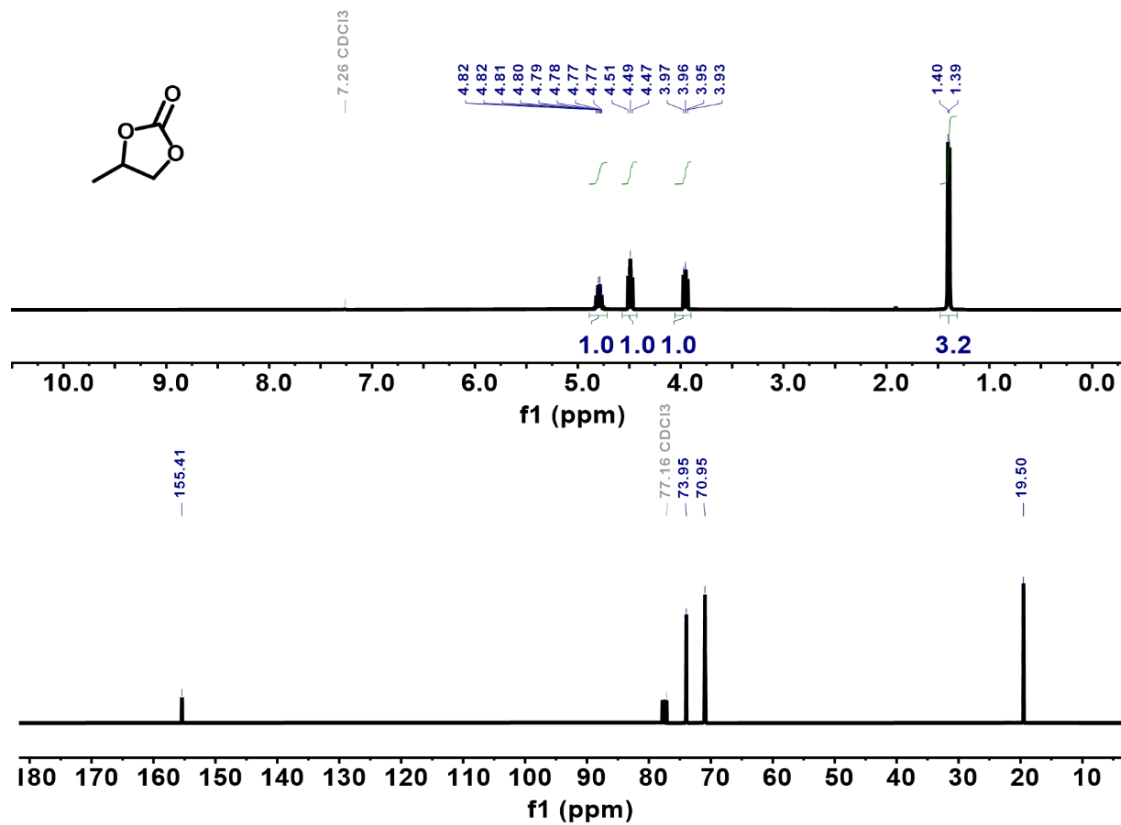

**4-(chloromethyl)-1,3-dioxolan-2-one:**  $^1\text{H}$  NMR (400 MHz, Chloroform-*d*)  $\delta$  4.98 (dddd,  $J = 8.3, 5.7, 4.5, 3.6$  Hz, 1H), 4.55 (t,  $J = 8.6$  Hz, 1H), 4.34 (dd,  $J = 8.9, 5.7$  Hz, 1H), 3.88 – 3.64 (m, 2H).  $^{13}\text{C}$  NMR (101 MHz, Chloroform-*d*)  $\delta$  154.85, 74.80, 67.21, 44.48

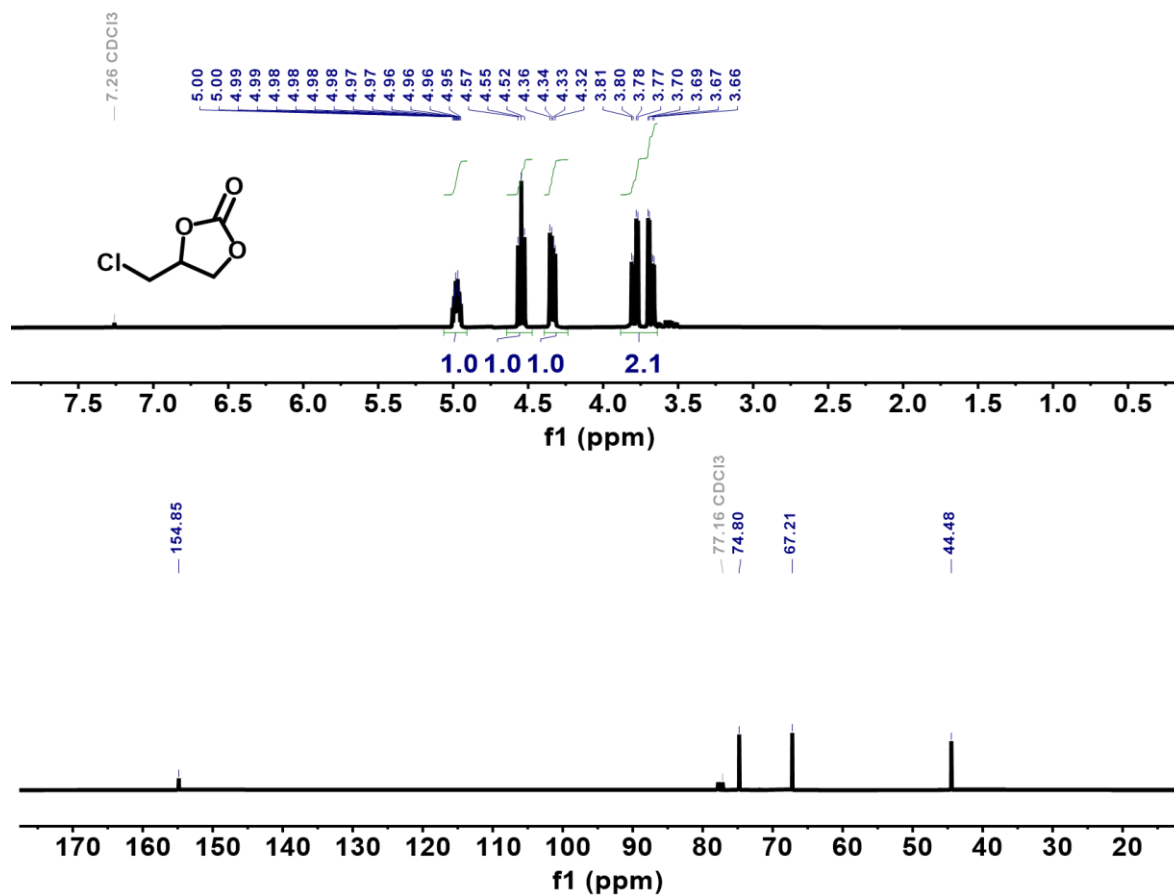

**4-(bromomethyl)-1,3-dioxolan-2-one:**  $^1\text{H}$  NMR (400 MHz, Chloroform-*d*)  $\delta$  4.96 (ddd,  $J = 10.7, 8.1, 5.3$  Hz, 1H), 4.69 – 4.55 (m, 1H), 4.36 (dd,  $J = 8.7, 5.9$  Hz, 1H), 3.58 (d,  $J = 5.0$  Hz, 2H).  $^{13}\text{C}$  NMR (101 MHz, Chloroform-*d*)  $\delta$  154.35, 74.08, 68.26, 31.55.

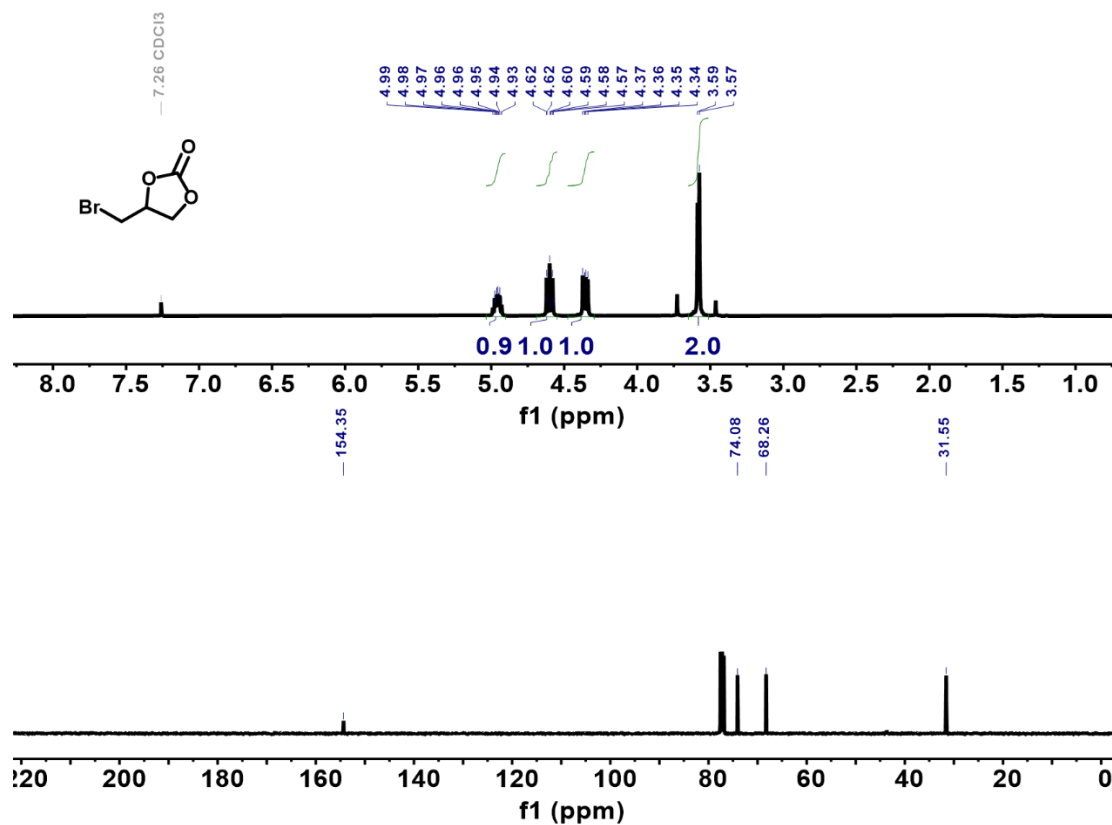

**4-(pent-4-en-1-yl)-1,3-dioxolan-2-one (4a):**  $^1\text{H}$  NMR (400 MHz, Chloroform-*d*)  $\delta$  4.72 (ddt,  $J = 9.1, 6.3, 3.4$  Hz, 1H), 4.39 (t,  $J = 8.4$  Hz, 1H), 4.24 (dd,  $J = 8.4, 5.9$  Hz, 1H), 3.56 (dd,  $J = 11.2, 3.2$  Hz, 1H), 3.46 (dd,  $J = 11.3, 3.6$  Hz, 1H), 3.38 (dd,  $J = 6.9, 5.9$  Hz, 2H), 1.42 (dq,  $J = 8.4, 6.6$  Hz, 2H), 1.33 – 1.16 (m, 2H), 0.78 (t,  $J = 7.4$  Hz, 3H).  $^{13}\text{C}$  NMR (101 MHz, Chloroform-*d*)  $\delta$  154.75, 74.95, 71.08, 69.07, 65.72, 30.93, 18.54, 13.22.

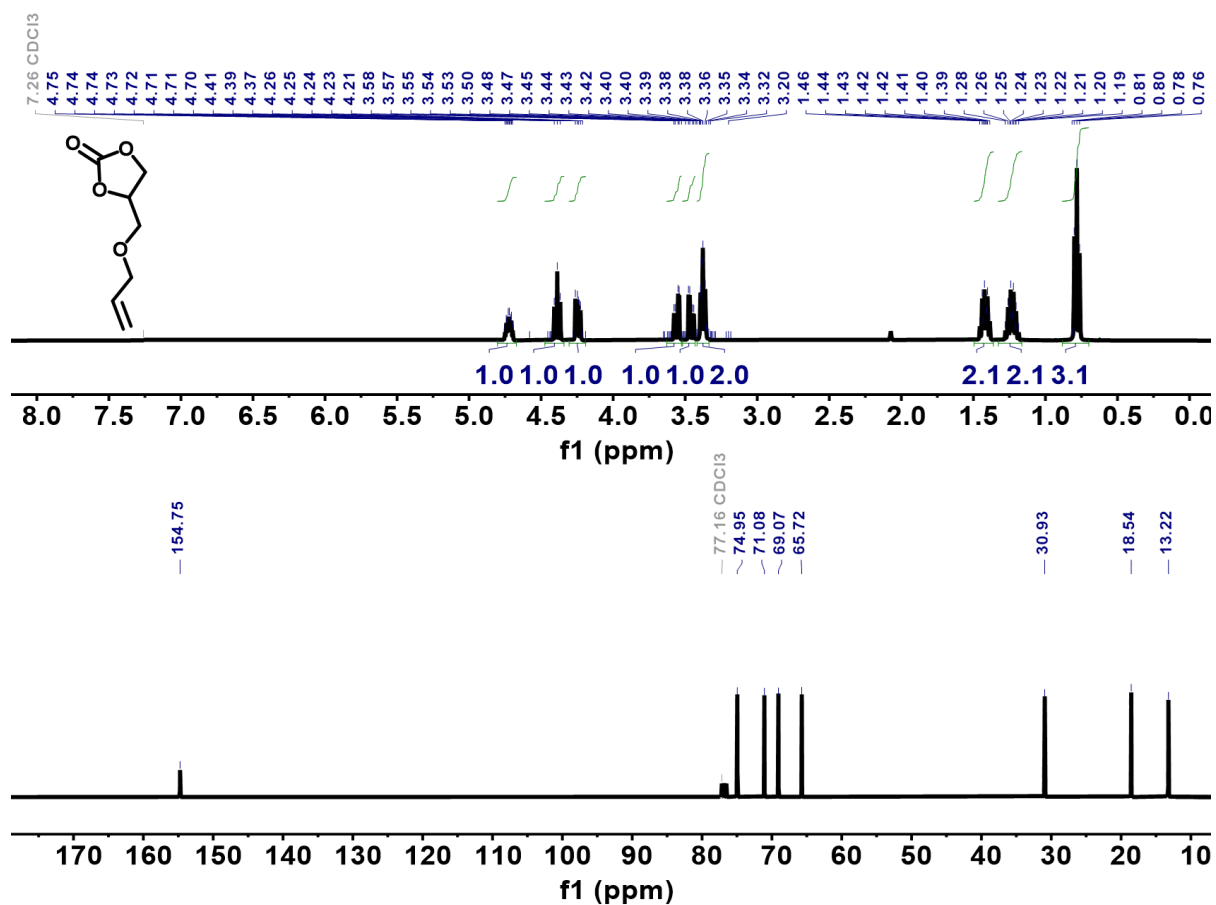

**4-(butoxymethyl)-1,3-dioxolan-2-one:**  $^1\text{H}$  NMR (400 MHz, )  $\delta$  5.86 (ddd,  $J = 22.6, 10.8, 5.7$  Hz, 1H), 5.39 – 5.12 (m, 2H), 4.83 (ddt,  $J = 7.9, 5.8, 3.8$  Hz, 1H), 4.50 (t,  $J = 8.3$  Hz, 1H), 4.40 (dd,  $J = 8.5, 6.0$  Hz, 1H), 4.13 – 3.97 (m, 2H), 3.69 (dd,  $J = 11.0, 3.8$  Hz, 1H), 3.61 (dd,  $J = 11.0, 3.8$  Hz, 1H).  $^{13}\text{C}$  NMR (101 MHz, Chloroform- $d$ )  $\delta$  154.80, 133.40, 117.83, 74.80, 72.37, 68.55, 66.06.

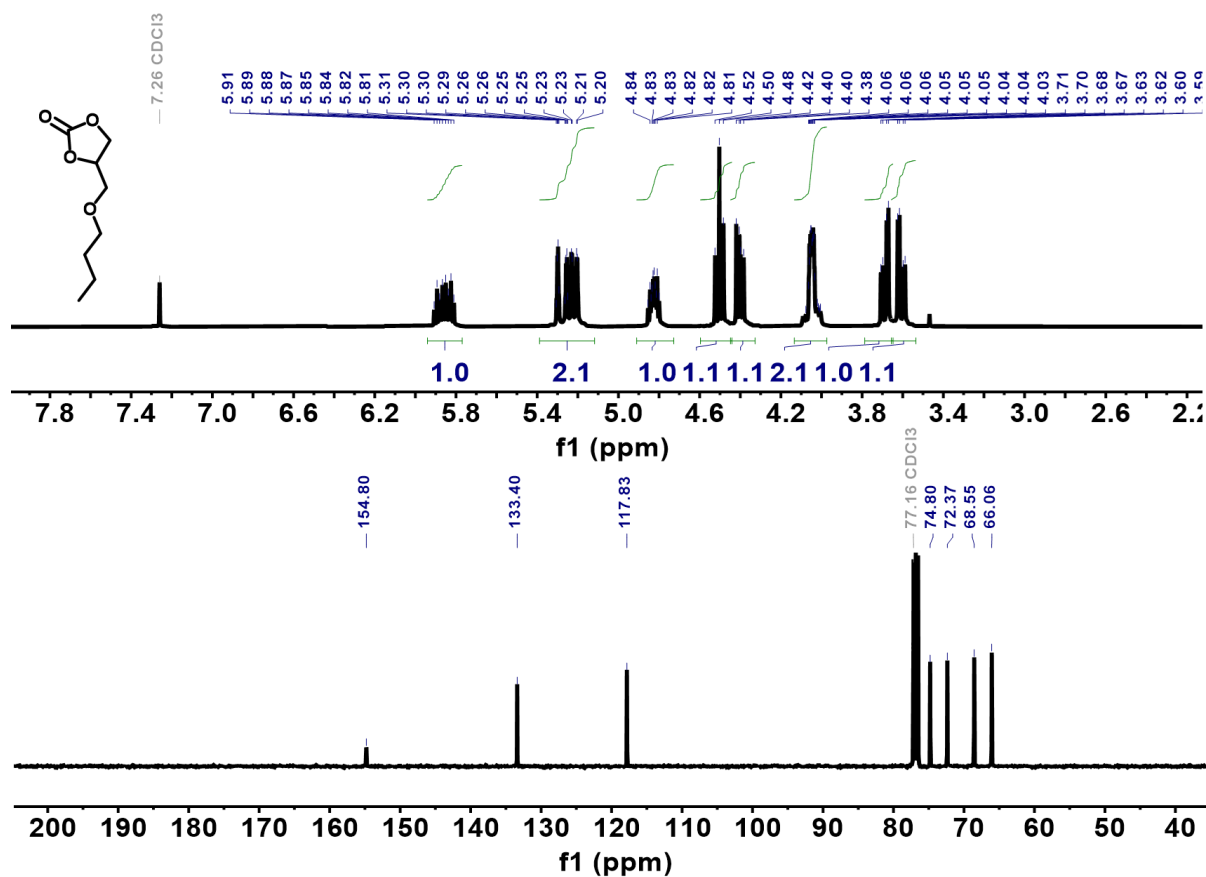

**4-butyl-1,3-dioxolan-2-one:**  $^1\text{H}$  NMR (400 MHz, Chloroform-*d*)  $\delta$  4.77 – 4.62 (m, 1H), 4.52 (t,  $J = 8.2$  Hz, 1H), 4.13 – 3.99 (m, 1H), 1.77 (ddd,  $J = 13.6, 7.8, 4.8$  Hz, 1H), 1.67 (ddd,  $J = 14.1, 9.7, 5.0$  Hz, 1H), 1.50 – 1.24 (m, 4H), 0.90 (t,  $J = 7.0$  Hz, 3H).  $^{13}\text{C}$  NMR (101 MHz, Chloroform-*d*)  $\delta$  155.30, 69.51, 33.60, 26.48, 22.31, 13.90.

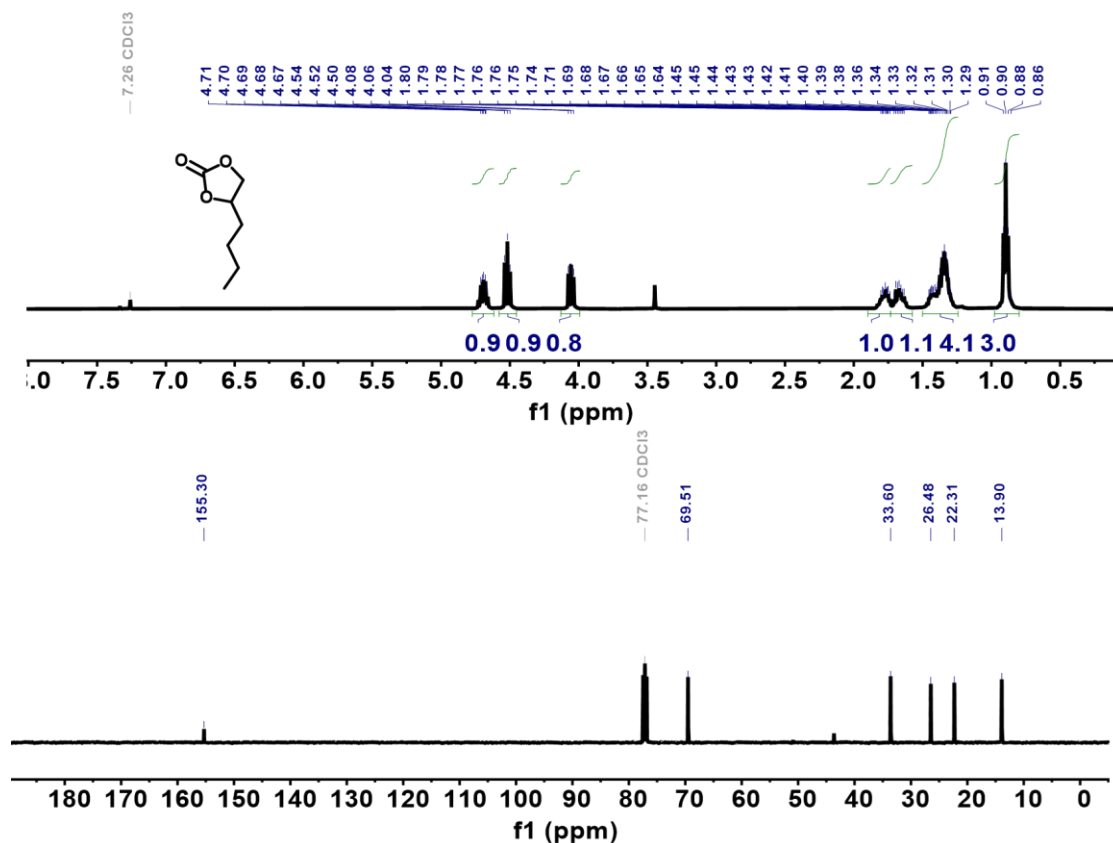

**4-(phoxymethyl)-1,3-dioxolan-2-one:**  $^1\text{H}$  NMR (400 MHz,  $\text{DMSO-}d_6$ )  $\delta$  7.31 (td,  $J = 8.0, 7.5, 4.9$  Hz, 2H), 6.97 (dt,  $J = 8.2, 3.7$  Hz, 3H), 5.15 (dq,  $J = 8.3, 5.2, 2.5$  Hz, 1H), 4.63 (td,  $J = 8.4, 4.8$  Hz, 1H), 4.39 (dt,  $J = 8.5, 5.2$  Hz, 1H), 4.28 (dq,  $J = 11.4, 2.7$  Hz, 1H), 4.24–4.17 (m, 1H).  $^{13}\text{C}$  NMR (101 MHz,  $\text{DMSO-}d_6$ )  $\delta$  157.73, 154.65, 129.40, 121.04, 114.40, 74.62, 67.18, 65.82.

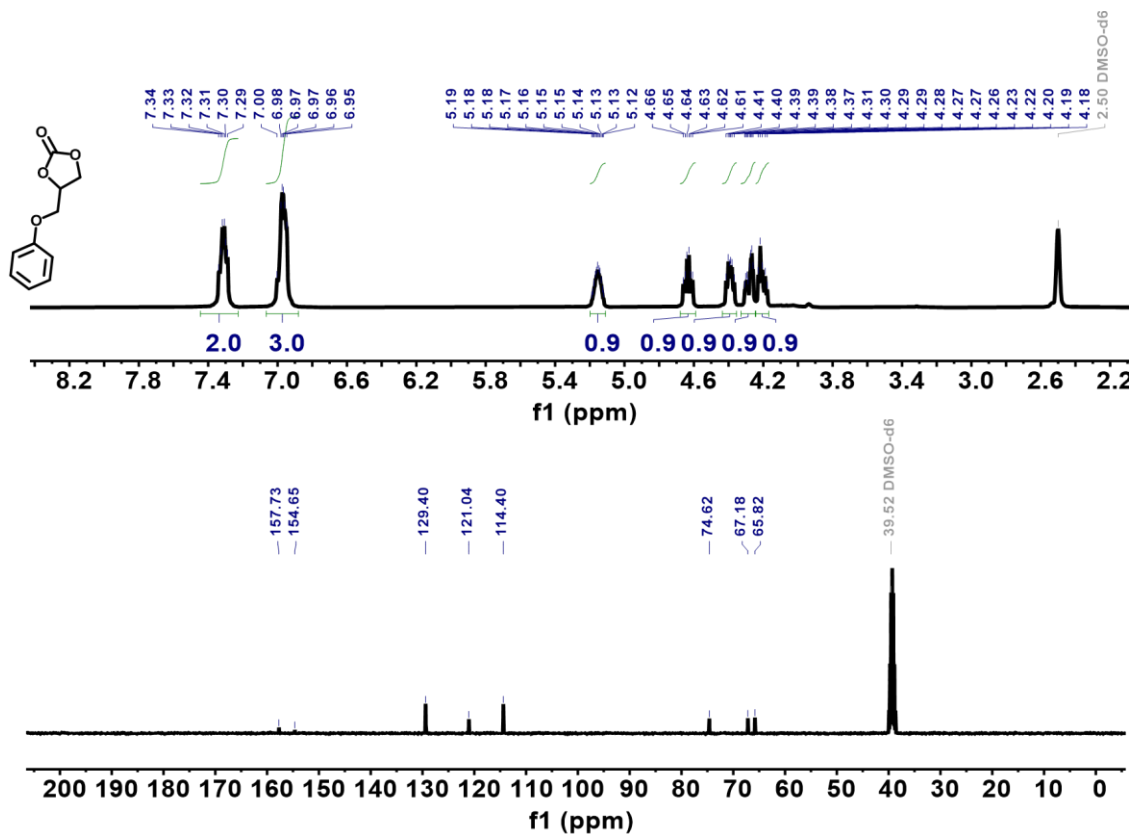

### 3. References

- 1 Y.-R. Du, G.-R. Ding, Y.-F. Wang, B.-H. Xu and S.-J. Zhang, *Green Chem.*, 2021, **23**, 2411-2419..
- 2 X. Gu, H. Niu, H. Ding, W. Zhang, Y. Shi and Y. Cai, *Adv. Funct. Mater.*, 2025, **35**, 2422116.
- 3 H. Lyu, X. Wang, W. Sun, E. Xu, Y. She, A. Liu, D. Gao, M. Hu, J. Guo, K. Hu, J. Cheng, Z. Long, Y. Liu and P. Zhang, *Green Chem.*, 2023, **25**, 3592-3605.
- 4 C. Kang, Z. Zhang, S. Xi, H. Li, A. K. Usadi, D. C. Calabro, L. S. Baugh, Y. Wang and D. Zhao, *P Natl Acad. Sci.*, 2023, **120**, e2217081120.
- 5 X. Liao, Z. Wang, Z. Li, L. Kong, W. Tang, Z. Qin and J. Lin, *Chem. Eng. J.* 2023, **471**, 144455.
- 6 N. Huang, X. Chen, R. Krishna and D. Jiang, *Angew. Chem. Int. Ed.*, 2015, **54**, 2986-2990.
- 7 J. Zhang, Z.-A. Qiao, S. M. Mahurin, X. Jiang, S.-H. Chai, H. Lu, K. Nelson and S. Dai, *Angew. Chem. Int. Ed.*, 2015, **54**, 4582-4586.
- 8 M. Yin, L. Wang and S. Tang, *ACS Catal.* 2023, **13**, 13021-13033.
- 9 A. Dey, D. Brahma, S. Laha, V. R. Bakuru, S. R. V. Parambil, A. Singh, S. Balasubramanian and T. K. Maji, *Chem. Mater.*, 2025, **37**, 4314-4324
- 10 X. Yang, J. Zhao, J. Zeng, B. Chen, L. Tang, J. Zhang, A. Zeb, Z. Li, S. Zhang and Y. Zhang, *Green Chem.*, 2025, **27**, 1729-1739
- 11 G. Feng, M. Yang, H. Chen, B. Liu, Y. Liu and H. Li, *Sep. Purifi. Technol.*, 2023, **323**, 124484
- 12 P. Puthiaraj, S. Ravi, K. Yu and W.-S. Ahn, *Applied Catalysis B: Environmental*, 2019, **251**, 195-205.
- 13 B. Gui, X. Liu, Y. Cheng, Y. Zhang, P. Chen, M. He, J. Sun and C. Wang, *Angew. Chem. Int. Ed.*, 2022, **61**, e202113852.
- 14 B. Dong, L. Wang, S. Zhao, R. Ge, X. Song, Y. Wang and Y. Gao, *Chem. Commun.* 2016, **52**, 7082-7085.

15 N. Huang, P. Wang, M. A. Addicoat, T. Heine and D. Jiang, *Angew. Chem. Int. Ed.*, 2017, **56**, 4982-4986.
